# Supplementary material
Source: PubMed Central journal article supplement (PMC7820682)
Supplement: JCB895245_Supplemental_Material.pdf [file JCB895245_Supplemental_Material.pdf]

**Supplementary Table 1. Summary of statistical comparisons between young adult and aged animals.** Table shows tissue class and arterial territory assignments, as well as abbreviations for each area surveyed. Post-hoc comparisons between young adult and aged animals in vessel density, vessel tortuosity, mean vessel diameter, and cortical thickness are shown for each region, tissue class or perfusion territory.

| Young-adult vs. Aged Comparisons |                                  |              |                    |                                  | Density    |        |       |                             | Tortuosity |       |       |                             | Diameter   |        |       |                             | Low Density Subsections |         |       |                             | (Cortical) Thickness |       |       |                             |
|----------------------------------|----------------------------------|--------------|--------------------|----------------------------------|------------|--------|-------|-----------------------------|------------|-------|-------|-----------------------------|------------|--------|-------|-----------------------------|-------------------------|---------|-------|-----------------------------|----------------------|-------|-------|-----------------------------|
| Abbreviation                     | Full name                        | Tissue Type  | Arterial Territory | Territory Reference              | Adjusted P | t      | DF    | % Change (Young adult-aged) | Adjusted P | t     | DF    | % Change (Young adult-aged) | Adjusted P | t      | DF    | % Change (Young adult-aged) | Adjusted P              | t       | DF    | % Change (Young adult-aged) | Adjusted P           | t     | DF    | % Change (Young adult-aged) |
| C. Callosum                      | Corpus Callosum                  | White matter | ACA                | Images from (Endepols et al.,    | <0.0001    | 7.194  | 48.8  | -26.83                      | 0.4899     | 2.071 | 47.31 | -0.68552                    | 0.9995     | 0.852  | 50.02 | 1.444328                    | 0.0002                  | 4.844   | 55.44 | 126.6047                    | 0.5714               | 1.612 | 44.87 | 6.885645                    |
| Fimbria                          | Fimbria                          | White matter | ACA                | (Thomas et al., 2011)            | 0.0826     | 2.874  | 55.59 | -11.63                      | 0.8631     | 1.563 | 51.68 | -0.59473                    | 0.0008     | 4.427  | 48.23 | 7.930941                    | 0.9757                  | 1.244   | 49.64 | 30.28617                    |                      |       |       |                             |
| FrA                              | Frontal Association Cortex       | Cortical     | ACA                | Images from (Endepols et al.,    | 0.0759     | 2.907  | 54.82 | -7.824                      | 0.0432     | 3.131 | 48.9  | 0.600343                    | 0.6291     | 1.889  | 56.83 | 2.54152                     | 0.9999                  | 0.763   | 53.11 | -36.7971                    |                      |       |       |                             |
| GI/DI                            | Insular Cortex                   | Cortical     | MCA                | Images from (Rousselet et al.,   | 0.9087     | 1.47   | 53.4  | -3.289                      | 0.2569     | 2.409 | 51.41 | 0.512821                    | 0.0019     | 4.131  | 53.39 | 5.590513                    | >0.9999                 | 0.0999  | 53.96 | 3.795893                    | 0.002                | 3.856 | 58.62 | -5.72391                    |
| PRh/Ect                          | Perirhinal/Ectorhinal Cortex     | Cortical     | MCA                | Images from (Rousselet et al.,   | <0.0001    | 5.976  | 52.11 | -16.04                      | 0.7094     | 1.793 | 49    | 0.426621                    | 0.0007     | 4.652  | 35.87 | 7.80759                     | 0.591                   | 1.944   | 47.09 | 53.73953                    | 0.0014               | 3.978 | 58.5  | -6.07073                    |
| M1/M2                            | Primary/Secondary Motor Cortex   | Cortical     | ACA                | Images from (Endepols et al.,    | <0.0001    | 5.967  | 54.77 | -10.01                      | 0.1429     | 2.669 | 49.99 | 0.599829                    | 0.1572     | 2.638  | 45.92 | 3.51972                     | 0.8716                  | 1.55    | 46.39 | 80.94824                    | 0.0078               | 3.429 | 58.4  | -5.62891                    |
| S1FL                             | Forelimb Primary Somatosensory   | Cortical     | MCA                | Images from (Rousselet et al.,   | 0.0013     | 4.207  | 61.17 | -7.214                      | 0.0889     | 2.854 | 52.17 | 0.515907                    | 0.0207     | 3.395  | 47.56 | 4.828974                    | 0.1792                  | 2.569   | 52.68 | 95.3304                     | 0.0024               | 3.802 | 59.82 | -6.17733                    |
| RS                               | Retrosplenial Cortex             | Cortical     | PCA                | Images from (Xiong et al., 2017) | 0.0089     | 3.659  | 51.35 | -7.915                      | 0.7957     | 1.674 | 49.98 | 0.429923                    | 0.0003     | 4.781  | 42.62 | 8.438384                    | >0.9999                 | 0.5952  | 44.66 | -28.1231                    | 0.0478               | 2.807 | 53.35 | -4.02641                    |
| V1                               | Primary Visual Cortex            | Cortical     | PCA                | (Pula & Yuen, 2017)              | 0.997      | 1.001  | 56.55 | -2.144                      | 0.0224     | 3.414 | 38.82 | 0.598802                    | >0.9999    | 0.3276 | 49.06 | -0.41708                    | >0.9999                 | 0.07711 | 46.38 | -2.32558                    | 0.0005               | 4.336 | 52.19 | -5.51172                    |
| HPC                              | Dorsal Hippocampus               | Subcortical  | PCA                | (Erdem et al., 1993)             | 0.0007     | 4.421  | 56.5  | -9.855                      | 0.0264     | 3.369 | 36.72 | 0.599315                    | <0.0001    | 5.883  | 41.21 | 9.084084                    | 0.9982                  | 0.954   | 52.99 | 28.09917                    |                      |       |       |                             |
| STR                              | Striatum (Caudate/Putamen)       | Subcortical  | MCA                | (Feekes & Cassell, 2006)         | 0.0582     | 3.002  | 56.56 | -4.598                      | 0.4014     | 2.19  | 45.83 | 0.427716                    | <0.0001    | 5.347  | 49.38 | 7.820513                    | 0.9928                  | 1.095   | 38.72 | 92.99641                    |                      |       |       |                             |
| Thalamus                         | Thalamus                         | Subcortical  | PCA                | (Schmahmann, 2003)               | 0.2904     | 2.342  | 58.22 | -4.266                      | 0.5514     | 1.999 | 42.29 | 0.344828                    | <0.0001    | 6.603  | 46.72 | 10.07121                    | >0.9999                 | 0.5395  | 43.47 | 38.53484                    |                      |       |       |                             |
| Hypothalamus                     | Hypothalamus                     | Subcortical  | PCA                | (Daniel, 1966)                   | 0.0096     | 3.613  | 56.57 | -11.09                      | 0.0505     | 3.106 | 40.79 | 0.684346                    | 0.8696     | 1.552  | 49.67 | 2.735174                    | >0.9999                 | 0.539   | 48.77 | 17.74222                    |                      |       |       |                             |
| LA                               | Lateral Amygdala                 | Subcortical  | MCA                | (Merksz et al., 1978)            | >0.9999    | 0.0201 | 41.76 | -0.07518                    | 0.0064     | 3.764 | 51.33 | 0.861326                    | 0.9982     | 0.9538 | 52.4  | 1.921132                    | 0.9996                  | 0.8469  | 35.81 | 46.00688                    |                      |       |       |                             |
| SNR                              | Substantia Nigra Pars Reticulata | Subcortical  | MCA                | (Sonne & Beato, 2019)            | 0.081      | 2.88   | 56.27 | -7.34                       | 0.0809     | 2.904 | 46.81 | 0.85034                     | 0.9887     | 1.142  | 57.69 | 1.869631                    | 0.001                   | 4.535   | 34.42 | 169.4276                    |                      |       |       |                             |
| ACA                              | Anterior Cerebral Artery         |              |                    |                                  | <0.0001    | 5.911  | 56.73 | -12.8327                    |            |       |       |                             |            |        |       |                             | 0.0228                  | 2.769   | 54.9  | 56.45514                    |                      |       |       |                             |
| MCA                              | Middle Cerebral Artery           |              |                    |                                  | 0.0005     | 4.335  | 44.91 | -7.73626                    |            |       |       |                             |            |        |       |                             | 0.1087                  | 2.134   | 51.46 | 43.79865                    |                      |       |       |                             |
| PCA                              | Posterior Cerebral Artery        |              |                    |                                  | 0.0007     | 4.125  | 59.73 | -6.6942                     |            |       |       |                             |            |        |       |                             | 0.1097                  | 2.128   | 53.63 | 41.56311                    |                      |       |       |                             |
| WM                               | White Matter                     |              |                    |                                  | <0.0001    | 6.614  | 50.76 | -22.4813                    |            |       |       |                             |            |        |       |                             | 0.0007                  | 3.962   | 51.86 | 84.23272                    |                      |       |       |                             |
| CGM                              | Cortical Gray Matter             |              |                    |                                  | <0.0001    | 5.33   | 54.07 | -8.65645                    |            |       |       |                             |            |        |       |                             | 0.998                   | 0.1599  | 45.06 | -4.41696                    |                      |       |       |                             |
| SGM                              | Subcortical Gray Matter          |              |                    |                                  | 0.0008     | 4.125  | 54.6  | -5.83602                    |            |       |       |                             |            |        |       |                             | 0.0401                  | 2.56    | 50.02 | 52.99632                    |                      |       |       |                             |

**Supplementary Table 2. Summary of previous research estimating vessel loss with aging.** Review of existing literature on microvascular loss, excluding studies that focused on arterioles or larger vessels. Includes information on subject species, brain region, method of vascular labeling, age, measurement metric, and time-adjusted magnitude of change in vessel density. Negative values indicate vessel loss. Some values are approximations based on interpretations of figures.

| Author                                             | Animal  | Area                         | Method                             | Age                                  | months | metric | % change  | % change / 12 months |
|----------------------------------------------------|---------|------------------------------|------------------------------------|--------------------------------------|--------|--------|-----------|----------------------|
| (Hunziker et al., 1979)                            | Human   | Precentral gyrus             | Alkaline phosphatase               | 19-94 y/o (group means approx 32-90) | 696    | length | -2        | 0                    |
| (Hunziker et al., 1979)                            | Human   | Precentral gyrus             | Alkaline phosphatase               | 19-94 y/o (group means approx 32-90) | 696    | volume | 1         | 0                    |
| (Meier-Ruge et al., 1980)                          | Human   | Putamen                      | Alkaline phosphatase               | 19-94 y/o (group means approx 32-90) | 696    | length | 60        | 1                    |
| (Meier-Ruge et al., 1980)                          | Human   | Putamen                      | Alkaline phosphatase               | 19-94 y/o (group means approx 32-90) | 696    | volume | 84        | 1.5                  |
| (Meier-Ruge et al., 1980)                          | Human   | Cortex                       | Alkaline phosphatase               | 19-94 y/o (group means approx 32-90) | 696    | length | -4        | -0.1                 |
| (Meier-Ruge et al., 1980)                          | Human   | Cortex                       | Alkaline phosphatase               | 19-94 y/o (group means approx 32-90) | 696    | volume | -3        | -0.1                 |
| (Bell and Ball, 1981)                              | Human   | Hippocampus                  | Alkaline phosphatase               | 38-74 y/o                            | 432    | length | -16       | -0.4                 |
| (Mann et al., 1986)                                | Human   | Frontal cortex               | Alkaline phosphatase               | 26-96 y/o                            | 840    | length | -46       | -0.7                 |
| (Mann et al., 1986)                                | Human   | Frontal cortex               | Alkaline phosphatase               | 26-96 y/o                            | 840    | area   | -35       | -0.5                 |
| (Mann et al., 1986)                                | Human   | Temporal cortex              | Alkaline phosphatase               | 26-96 y/o                            | 840    | length | No change | 0                    |
| (Mann et al., 1986)                                | Human   | Temporal cortex              | Alkaline phosphatase               | 26-96 y/o                            | 840    | area   | No change | 0                    |
| (Bell and Ball, 1990)                              | Human   | Visual cortex                | Alkaline phosphatase               | 31-79 y/o                            | 576    | length | -16       | -0.3                 |
| (Abernethy et al., 1993)                           | Human   | PVN hypothalamus             | Alkaline phosphatase               | 30-85 y/o                            | 660    | length | -49       | -0.9                 |
| (Abernethy et al., 1993)                           | Human   | Supraoptic hypothalamus      | Alkaline phosphatase               | 30-85 y/o                            | 660    | length | No change | 0                    |
| (Buée et al., 1994)                                | Human   | Cortex                       | Vascular HSPG                      | 49-79 y/o                            | 360    | area   | -28       | -0.9                 |
| (Farkas et al., 2006)                              | Human   | White matter                 | Hematoxylin-eosin staining         | 40-90y/o                             | 600    | length | No change | 0                    |
| (Brown et al., 2007b)                              | Human   | White matter                 | Alkaline phosphatase               | 57-90 y/o                            | 396    | area   | -64       | -1.9                 |
| (Brown et al., 2007b)                              | Human   | Cortex                       | Alkaline phosphatase               | 57-90 y/o                            | 396    | area   | -69       | -2.1                 |
| (Burns et al., 1981)                               | Macaque | Frontal cortex               | Microfil                           | 10-20y/o                             | 120    | area   | -22.2     | -2.2                 |
| (Burns et al., 1981)                               | Macaque | Frontal cortex               | Microfil                           | 4-20y/o                              | 192    | area   | -27.8     | -1.7                 |
| (Sturrock, 1977)                                   | Mouse   | Indusium griseum             |                                    |                                      |        |        | No change |                      |
| (Murugesan et al., 2012)                           | Mouse   | Cortex                       | CD31                               | 7-23 m/o                             | 16     | length | -19.3     | -14.5                |
| (Murugesan et al., 2012)                           | Mouse   | White matter                 | CD31                               | 7-23 m/o                             | 16     | length | -34.5     | -25.9                |
| (Murugesan et al., 2012)                           | Mouse   | Hippocampus                  | CD31                               | 7-23 m/o                             | 16     | length | -26.4     | -19.8                |
| (Moeini et al., 2018)                              | Mouse   | S1 barrel cortex             | Fluorescent plasma label           | 7.5-26 m/o                           | 18.5   | volume | -17       | -1.1                 |
| (Reeson et al., 2018)                              | Mouse   | S1 cortex                    | Evans Blue plasma label            | 3.5-16.5 m/o                         | 13     | number | -8        | -7.4                 |
| (Klein and Michel, 1977)                           | Rat     | Frontal and Occipital cortex | Windel's thionin                   | 6-25 m/o                             | 19     | number | -21       | -13.3                |
| (Bär, 1978)                                        | Rat     | Occipital cortex             |                                    | 6-30 m/o                             | 24     |        | 19        | 9.5                  |
| (Knox and Oliveira, 1980)                          | Rat     | Cortex                       | Toluidine blue                     | 4-23 m/o                             | 19     | number | -7.9      | -5                   |
| (Burns et al., 1981)                               | Rat     | Frontal cortex               | Microfil                           | 35-800 d/o                           | 25.5   | area   | 39        | 18.4                 |
| (Wilkinson et al., 1981)                           | Rat     | Cortex                       | Latex and luconyl blue perfusion   | 13-120 w/o                           | 27     | number | 10        | 4.4                  |
| (Hinds and McNelly, 1982)                          | Rat     | Olfactory bulb               | Toluidine blue                     | 3-36 m/o                             | 33     | length | -15       | -5.5                 |
| (Casey and Feldman, 1985)                          | Rat     | Brainstem                    | Toluidine blue                     | 3-33 m/o                             | 30     | volume | -27.4     | -11                  |
| (Buchweitz-Milton and Weiss, 1987)                 | Rat     | Cortex                       | Alkaline phosphatase, FITC dextran | 9-30.5 m/o                           | 21.5   | length | -29.5     | -16.5                |
| (Hughes and Lantos, 1987)                          | Rat     | Cortex                       | Toluidine blue                     | 3-22.5 m/o                           | 19.5   | number | 10        | 6.2                  |
| (Meier-Ruge and Schulz-Dazzi, 1987)                | Rat     | Parietal cortex              | Alkaline phosphatase               | 12-36 m/o                            | 24     | volume | 1         | 0.5                  |
| (Meier-Ruge and Schulz-Dazzi, 1987)                | Rat     | Parietal cortex              | Alkaline phosphatase               | 12-36 m/o                            | 24     | length | -7.5      | -3.8                 |
| (Black et al., 1989)                               | Rat     | Visual cortex                | Toluidine blue                     | 12-22 m/o                            | 10     |        | No change |                      |
| (Jucker and Meier-Ruge, 1989; Jucker et al., 1990) | Rat     | Hippocampus                  | Alkaline phosphatase               | 18-27.5 m/o                          | 9.5    | number | -21       | -26.5                |
| (Jucker and Meier-Ruge, 1989; Jucker et al., 1990) | Rat     | Parietal cortex              | Alkaline phosphatase               | 18-27.5 m/o                          | 9.5    | number | -26       | -32.8                |
| (Amenta et al., 1995a)                             | Rat     | Frontal cortex               | Alkaline phosphatase               | 12-24 m/o                            | 12     | number | -41.8     | -41.8                |
| (Amenta et al., 1995a)                             | Rat     | Frontal cortex               | Alkaline phosphatase               | 12-24 m/o                            | 12     | length | -30.1     | -30.1                |
| (Amenta et al., 1995a)                             | Rat     | Occipital cortex             | Alkaline phosphatase               | 12-24 m/o                            | 12     | number | -36.9     | -36.9                |
| (Amenta et al., 1995a)                             | Rat     | Occipital cortex             | Alkaline phosphatase               | 12-24 m/o                            | 12     | length | -5.6      | -5.6                 |
| (Amenta et al., 1995a)                             | Rat     | Hippocampus                  | Alkaline phosphatase               | 12-24 m/o                            | 12     | number | -48.7     | -48.7                |
| (Amenta et al., 1995a)                             | Rat     | Hippocampus                  | Alkaline phosphatase               | 12-24 m/o                            | 12     | length | -25       | -25                  |
| (Amenta et al., 1995b)                             | Rat     | Frontal cortex               | Alkaline phosphatase               | 12-27 m/o                            | 15     | number | -28.2     | -22.6                |
| (Amenta et al., 1995b)                             | Rat     | Frontal cortex               | Alkaline phosphatase               | 12-27 m/o                            | 15     | length | -11.6     | -9.3                 |
| (Amenta et al., 1995b)                             | Rat     | Occipital cortex             | Alkaline phosphatase               | 12-27 m/o                            | 15     | number | -17.8     | -14.2                |
| (Amenta et al., 1995b)                             | Rat     | Occipital cortex             | Alkaline phosphatase               | 12-27 m/o                            | 15     | length | -12.2     | -9.7                 |
| (Amenta et al., 1995b)                             | Rat     | Ammons horn                  | Alkaline phosphatase               | 12-27 m/o                            | 15     | number | -26.5     | -21.2                |
| (Amenta et al., 1995b)                             | Rat     | Ammons horn                  | Alkaline phosphatase               | 12-27 m/o                            | 15     | length | -14.7     | -11.8                |
| (Amenta et al., 1995b)                             | Rat     | Dentate                      | Alkaline phosphatase               | 12-27 m/o                            | 15     | number | -19.4     | -15.5                |
| (Amenta et al., 1995b)                             | Rat     | Dentate                      | Alkaline phosphatase               | 12-27 m/o                            | 15     | length | 20.4      | 16.3                 |
| (Villena et al., 2003)                             | Rat     | LGN                          | Toluidine blue                     | 3-28 m/o                             | 25     | length | 69.3      | 33.3                 |
| (Villena et al., 2003)                             | Rat     | LGN                          | Toluidine blue                     | 3-28 m/o                             | 25     | number | 19.4      | 9.3                  |
| (Villena et al., 2003)                             | Rat     | LGN                          | Toluidine blue                     | 3-28 m/o                             | 25     | volume | 36.4      | 17.5                 |
| (Villena et al., 2003)                             | Rat     | LGN                          | Toluidine blue                     | 3-28 m/o                             | 25     | area   | 29        | 13.9                 |
| (Villena et al., 2003)                             | Rat     | LGN                          | Toluidine blue                     | 18-28 m/o                            | 10     | length | -3.1      | -3.7                 |
| (Villena et al., 2003)                             | Rat     | LGN                          | Toluidine blue                     | 18-28 m/o                            | 10     | number | -3.2      | -3.8                 |
| (Villena et al., 2003)                             | Rat     | LGN                          | Toluidine blue                     | 18-28 m/o                            | 10     | volume | -6.3      | -7.6                 |
| (Villena et al., 2003)                             | Rat     | LGN                          | Toluidine blue                     | 18-28 m/o                            | 10     | area   | -4.7      | -5.6                 |
| (Villar-Cheda et al., 2009)                        | Rat     | Substantia Nigra             | RECA1                              | 4-14 m/o                             | 10     | number | -14       | -16.8                |
| (Villar-Cheda et al., 2009)                        | Rat     | Substantia Nigra             | RECA1                              | 4-24 m/o                             | 20     | number | -21       | -12.6                |
| (Ndubuizu et al., 2010)                            | Rat     | Cortex                       | GLUT-1                             | 3-24 m/o                             | 21     | number | -10.3     | -5.9                 |
| (Ndubuizu et al., 2010)                            | Rat     | Corpus Callosum              | GLUT-1                             | 3-24 m/o                             | 21     | number | -2.6      | -1.5                 |
| (Ndubuizu et al., 2010)                            | Rat     | Striatum                     | GLUT-1                             | 3-24 m/o                             | 21     | number | 2.8       | 1.6                  |
| (Ndubuizu et al., 2010)                            | Rat     | Hippocampus                  | GLUT-1                             | 3-24 m/o                             | 21     | number | -10.3     | -5.9                 |
| (Shao et al., 2010)                                | Rat     | White matter                 | Collagen 4                         | 7-27 m/o                             | 20     | length | -18.6     | -11.2                |
| (Shao et al., 2010)                                | Rat     | White matter                 | Collagen 4                         | 7-27 m/o                             | 20     | volume | -23.5     | -14.1                |
| (Zhang et al., 2012)                               | Rat     | Hippocampus                  | RECA1                              | 5-34 m/o                             | 29     | length | -40       | -16.6                |
| (Desjardins et al., 2014)                          | Rat     | S1 cortex                    | Fluorescent plasma label           | 3-24 m/o                             | 21     | number | -18.7     | -10.7                |
| (Desjardins et al., 2014)                          | Rat     | S1 cortex                    | Fluorescent plasma label           | 3-24 m/o                             | 21     | volume | -20.6     | -11.8                |
| (Tang et al., 2016)                                | Rat     | Cortex & Striatum            | Lectin                             | 3-24 m/o                             | 21     | number | -3.5      | -2                   |
| (Tang et al., 2016)                                | Rat     | Cortex & Striatum            | GLUT-1                             | 3-24 m/o                             | 21     | number | -10.6     | -6.1                 |
| (Schager & CE Brown, current)                      | Mouse   | Corpus Callosum              | FITC Dextran Plasma Label          | 3.5-19.5 m/o                         | 16     | length | -26.8     | -20.1                |
| (Schager & CE Brown, current)                      | Mouse   | Fimbria                      | FITC Dextran Plasma Label          | 3.5-19.5 m/o                         | 16     | length | -11.6     | -8.7                 |
| (Schager & CE Brown, current)                      | Mouse   | FRA                          | FITC Dextran Plasma Label          | 3.5-19.5 m/o                         | 16     | length | -7.8      | -5.9                 |
| (Schager & CE Brown, current)                      | Mouse   | GI/DI                        | FITC Dextran Plasma Label          | 3.5-19.5 m/o                         | 16     | length | -3.3      | -2.5                 |
| (Schager & CE Brown, current)                      | Mouse   | PRh/Ect                      | FITC Dextran Plasma Label          | 3.5-19.5 m/o                         | 16     | length | -16       | -12                  |
| (Schager & CE Brown, current)                      | Mouse   | M1/M2                        | FITC Dextran Plasma Label          | 3.5-19.5 m/o                         | 16     | length | -10       | -7.5                 |
| (Schager & CE Brown, current)                      | Mouse   | S1FL                         | FITC Dextran Plasma Label          | 3.5-19.5 m/o                         | 16     | length | -7.2      | -5.4                 |
| (Schager & CE Brown, current)                      | Mouse   | RS                           | FITC Dextran Plasma Label          | 3.5-19.5 m/o                         | 16     | length | -7.9      | -5.9                 |
| (Schager & CE Brown, current)                      | Mouse   | V1                           | FITC Dextran Plasma Label          | 3.5-19.5 m/o                         | 16     | length | -2.1      | -1.6                 |
| (Schager & CE Brown, current)                      | Mouse   | HPC                          | FITC Dextran Plasma Label          | 3.5-19.5 m/o                         | 16     | length | -9.9      | -7.4                 |
| (Schager & CE Brown, current)                      | Mouse   | STR                          | FITC Dextran Plasma Label          | 3.5-19.5 m/o                         | 16     | length | -4.6      | -3.4                 |
| (Schager & CE Brown, current)                      | Mouse   | Thalamus                     | FITC Dextran Plasma Label          | 3.5-19.5 m/o                         | 16     | length | -4.3      | -3.2                 |
| (Schager & CE Brown, current)                      | Mouse   | Hypothalamus                 | FITC Dextran Plasma Label          | 3.5-19.5 m/o                         | 16     | length | -11.1     | -8.3                 |
| (Schager & CE Brown, current)                      | Mouse   | LA                           | FITC Dextran Plasma Label          | 3.5-19.5 m/o                         | 16     | length | -0.1      | -0.1                 |
| (Schager & CE Brown, current)                      | Mouse   | SNR                          | FITC Dextran Plasma Label          | 3.5-19.5 m/o                         | 16     | length | -7.3      | -5.5                 |

**Supplementary Figure 1. Visual guide of sampling areas.** Figure describes stereotaxic levels and bounds of sampling locations for each brain area. These bounds guided ROI locations for each area in microsphere analysis and determined bounds and possible stereotaxic levels for confocal microscopy of vascular density.

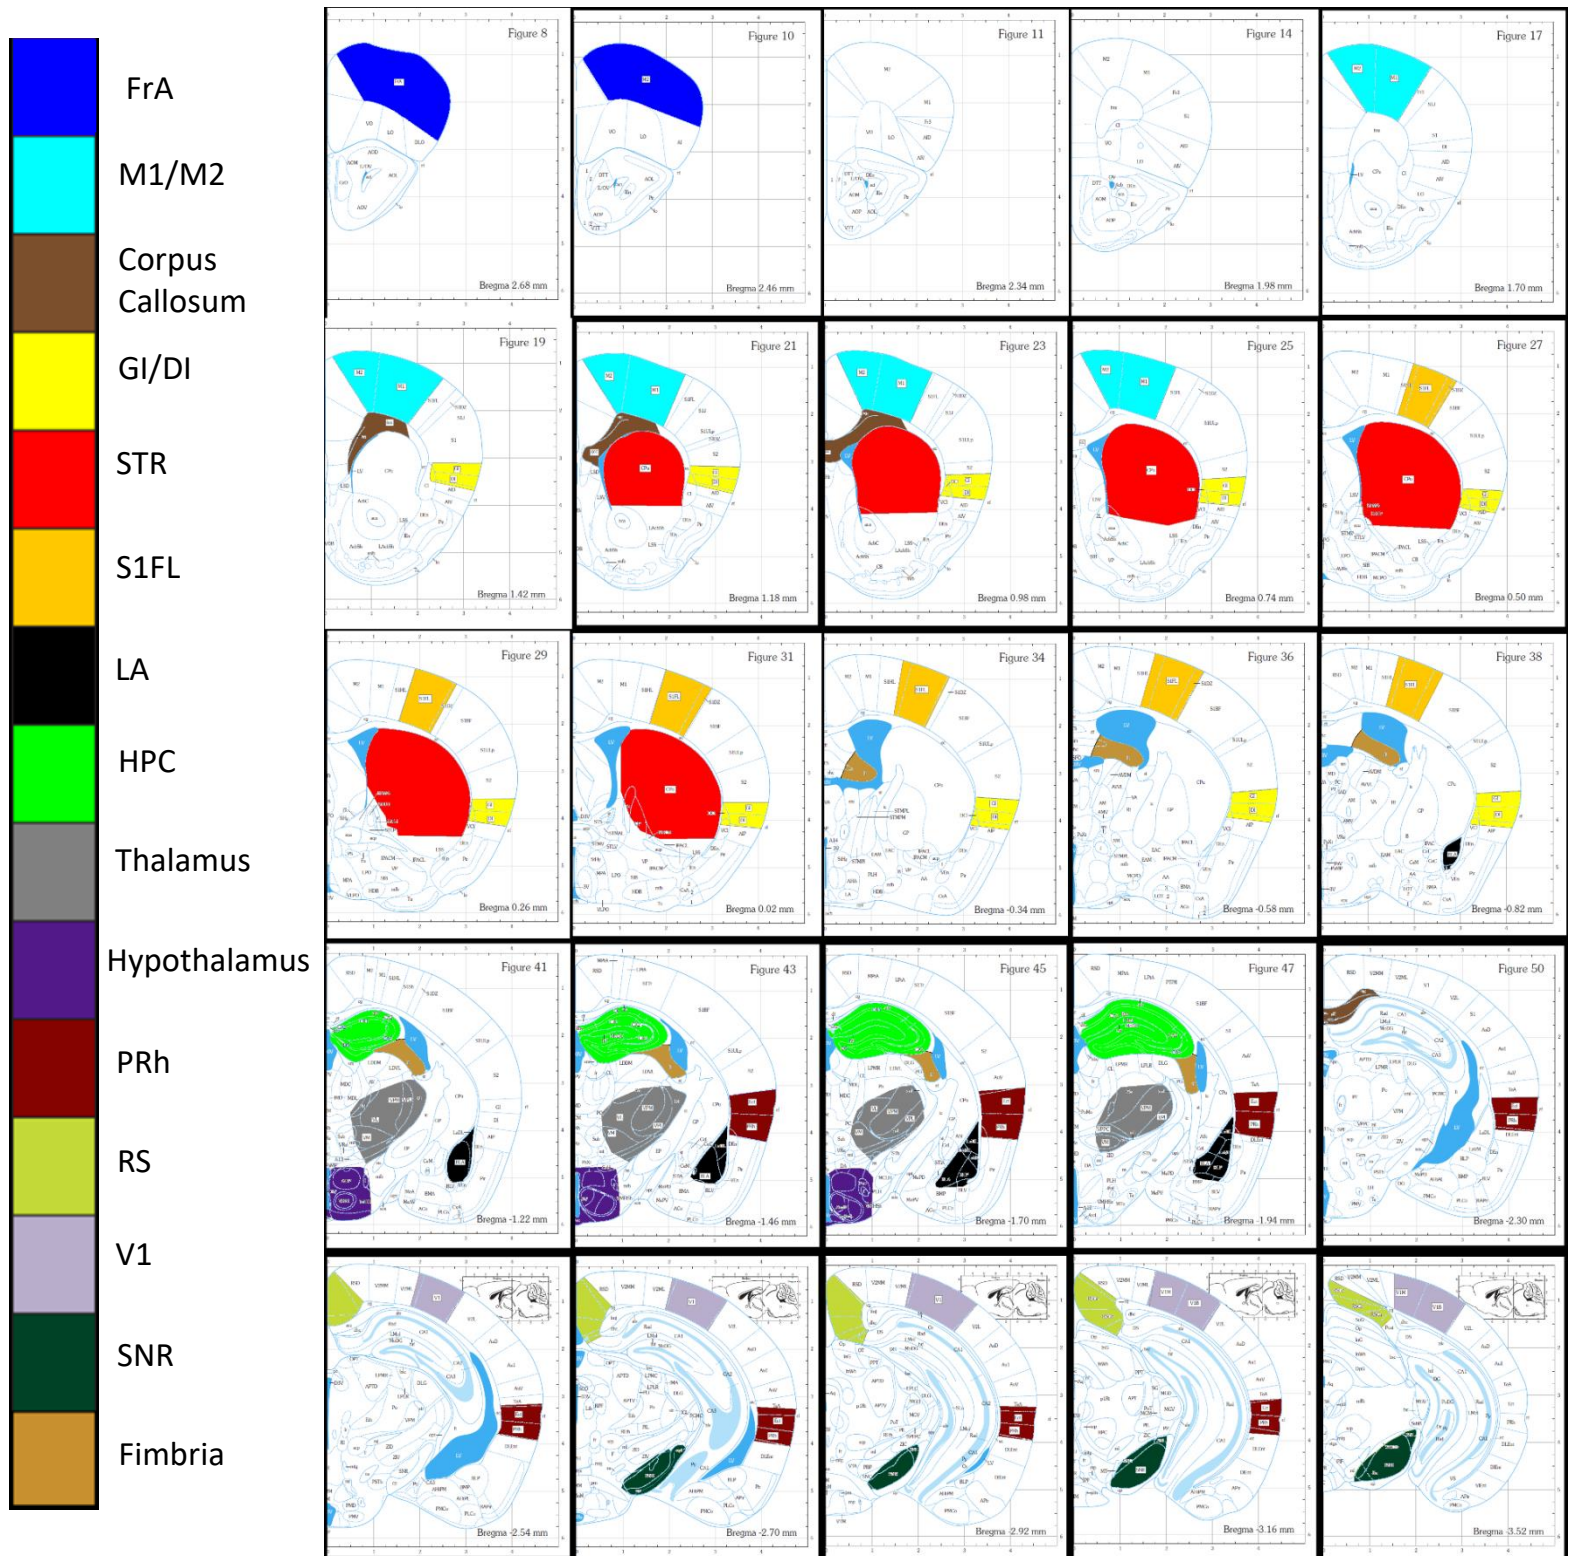

## Supplementary Data References

1. Abernethy WB, Bell MA, Morris M, et al. Microvascular Density of the Human Paraventricular Nucleus Decreases with Aging but Not Hypertension. *Experimental Neurology* 1993; 121: 270–274.
2. Bär T. Morphometric evaluation of capillaries in different laminae of rat cerebral cortex by automatic image analysis: changes during development and aging. *Adv Neurol* 1978; 20: 1–9.
3. Bell MA, Ball MJ. Morphometric comparison of hippocampal microvasculature in ageing and demented people: Diameters and densities. *Acta Neuropathol* 1981; 53: 299–318.
4. Bell MA, Ball MJ. Neuritic plaques and vessels of visual cortex in aging and Alzheimer's dementia. *Neurobiology of Aging* 1990; 11: 359–370.
5. Black JE, Polinsky M, Greenough WT. Progressive failure of cerebral angiogenesis supporting neural plasticity in aging rats. *Neurobiol Aging* 1989; 10: 353–358.
6. Brown WR, Moody DM, Thore CR, et al. Vascular dementia in leukoaraiosis may be a consequence of capillary loss not only in the lesions, but in normal-appearing white matter and cortex as well. *J Neurol Sci* 2007; 257: 62–66.
7. Buchweitz-Milton E, Weiss HR. Perfused capillary morphometry in the senescent brain. *Neurobiol Aging* 1987; 8: 271–276.
8. Buée L, Hof PR, Bouras C, et al. Pathological alterations of the cerebral microvasculature in Alzheimer's disease and related dementing disorders. *Acta Neuropathol* 1994; 87: 469–480.
9. Burns EM, Kruckeberg TW, Gaetano PK. Changes with age in cerebral capillary morphology. *Neurobiol Aging* 1981; 2: 283–291.
10. Casey MA, Feldman ML. Aging in the rat medial nucleus of the trapezoid body. III. Alterations in capillaries. *Neurobiol Aging* 1985; 6: 39–46.
11. Daniel PM. The blood supply of the hypothalamus and pituitary gland. *Br Med Bull* 1966; 22: 202–208.
12. Desjardins M, Berti R, Lefebvre J, et al. Aging-related differences in cerebral capillary blood flow in anesthetized rats. *Neurobiology of Aging* 2014; 35: 1947–1955.
13. Endepols H, Mertgens H, Backes H, et al. Longitudinal assessment of infarct progression, brain metabolism and behavior following anterior cerebral artery occlusion in rats. *Journal of Neuroscience Methods* 2015; 253: 279–291.
14. Erdem A, Yaşargil G, Roth P. Microsurgical anatomy of the hippocampal arteries. *J Neurosurg* 1993; 79: 256–265.
15. Farkas E, de Vos RAI, Donka G, et al. Age-related microvascular degeneration in the human cerebral periventricular white matter. *Acta Neuropathol* 2006; 111: 150–157.
16. Feekes JA, Cassell MD. The vascular supply of the functional compartments of the human striatum. *Brain* 2006; 129: 2189–2201.
17. Hinds JW, McNelly NA. Capillaries in aging rat olfactory bulb: a quantitative light and electron microscopic analysis. *Neurobiol Aging* 1982; 3: 197–207.

18. Hughes CCW, Lantos PL. A morphometric study of blood vessel, neuron and glial cell distribution in young and old rat brain. *Journal of the Neurological Sciences* 1987; 79: 101–110.
19. Hunziker O, Abdel'Al S, Schulz U. The aging human cerebral cortex: a stereological characterization of changes in the capillary net. *J Gerontol* 1979; 34: 345–350.
20. Jucker M, Bättig K, Meier-Ruge W. Effects of aging and vincamine derivatives on pericapillary microenvironment: stereological characterization of the cerebral capillary network. *Neurobiol Aging* 1990; 11: 39–46.
21. Jucker M, Meier-Ruge W. Effects of brovincamine on stereological capillary parameters in adult and old Fischer-344 rats. *Microvasc Res* 1989; 37: 298–307.
22. Klein AW, Michel ME. A morphometric study of the neocortex of young adult and old maze-differentiated rats. *Mech Ageing Dev* 1977; 6: 441–452.
23. Knox CA, Oliveira A. Brain aging in normotensive and hypertensive strains of rats. III. A quantitative study of cerebrovasculature. *Acta Neuropathol* 1980; 52: 17–25.
24. Mann DM, Eaves NR, Marcyniuk B, et al. Quantitative changes in cerebral cortical microvasculature in ageing and dementia. *Neurobiol Aging* 1986; 7: 321–330.
25. Meier-Ruge W, Hunziker O, Schulz U, et al. Stereological changes in the capillary network and nerve cells of the aging human brain. *Mech Ageing Dev* 1980; 14: 233–243.
26. Meier-Ruge W, Schulz-Dazzi U. Effects of brovincamine on the stereological parameters of corticocerebral capillaries. *Life Sciences* 1987; 40: 943–949.
27. Merksz M, Ambach G, Palkovits M. Blood supply of the rat amygdala. *Acta Morphol Acad Sci Hung* 1978; 26: 139–171.
28. Pula JH, Yuen CA. Eyes and stroke: the visual aspects of cerebrovascular disease. *Stroke Vasc Neurol* 2017; 2: 210–220.
29. Rousselet E, Kriz J, Seidah NG. Mouse Model of Intraluminal MCAO: Cerebral Infarct Evaluation by Cresyl Violet Staining. *J Vis Exp* 2012; e4038.
30. Schmahmann JD. Vascular syndromes of the thalamus. *Stroke* 2003; 34: 2264–2278.
31. Shao W-H, Li C, Chen L, et al. Stereological Investigation of Age-Related Changes of the Capillaries in White Matter. *The Anatomical Record* 2010; 293: 1400–1407.
32. Sonne J, Beato MR. Neuroanatomy, Substantia Nigra. In: *StatPearls*. Treasure Island, FL: StatPearls Publishing, 2019.
33. Sturrock RR. Quantitative and morphological changes in neurons and neuroglia in the indusium griseum of aging mice. *J Gerontol* 1977; 32: 647–658.
34. Tang Y, Wang L, Wang J, et al. Ischemia-induced Angiogenesis is Attenuated in Aged Rats. *Aging and disease* 2016; 7: 326–335.
35. Thomas AG, Koumellis P, Dineen RA. The Fornix in Health and Disease: An Imaging Review. *RadioGraphics* 2011; 31: 1107–1121.

36. Villar-Cheda B, Sousa-Ribeiro D, Rodriguez-Pallares J, et al. Aging and Sedentarism Decrease Vascularization and VEGF Levels in the Rat Substantia Nigra. Implications for Parkinson's Disease. *J Cereb Blood Flow Metab* 2009; 29: 230–234.
37. Wilkinson JH, Hopewell JW, Reinhold HS. A quantitative study of age-related changes in the vascular architecture of the rat cerebral cortex. *Neuropathol Appl Neurobiol* 1981; 7: 451–462.
38. Zhang R, Kadar T, Sirimanne E, et al. Age-related memory decline is associated with vascular and microglial degeneration in aged rats. *Behavioural Brain Research* 2012; 235: 210–217.
